# Supplementary material for: A bistable cholesteric liquid crystal film stabilized by a liquid-crystalline epoxy/thiol compound-based polymer
Source: Royal Society of Chemistry journal article supplement (doi:10.1039/d3cp02613b), 2023-01-01
Supplement: d3cp02613b1.pdf [file d3cp02613b1.pdf]

## Supporting Information

Bistable cholesteric liquid crystal film stabilized by liquid-crystalline epoxy/ thiol compound-based polymer

Huimin Zhang<sup>a,b,#</sup>, Fei Li<sup>c#</sup>, Junqin Li<sup>b</sup>, Zemin He<sup>a,b</sup>, Jianjing Gao<sup>a,b</sup>, Lifeng Wen<sup>b</sup>, Yuzhen Zhao<sup>a,b</sup>, Zongcheng Miao<sup>d\*</sup>

<sup>a</sup> *Technological Institute of Materials & Energy Science (TIMES), Xijing University, Xi'an 710123, P. R. China.*

<sup>b</sup> *Xi'an Key Laboratory of Advanced Photo-electronics Materials and Energy Conversion Device, School of Electronic Information, Xijing University, Xi'an 710123, P. R. China.*

<sup>c</sup> *Xi'an Manareco New Materials Co Ltd, Xi'an 710077, P. R. China.*

<sup>d</sup> *School of Artificial Intelligence, Optics and Electronics (Iopen), Northwestern Polytechnical University, Xi'an, Shaanxi, P.R. China.*

\* Correspondence to: *Zongcheng Miao (miaozongcheng@nwpu.edu.cn).*

# Huimin Zhang and Fei Li contributed equally to this work.

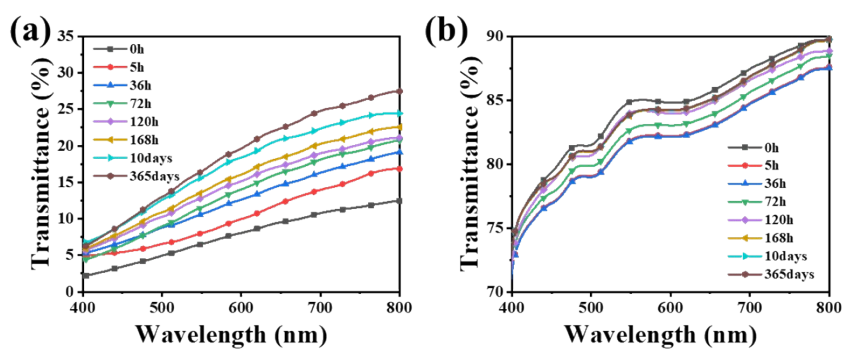

**Figure S1.** Transmission spectra of sample A4 at different time after removing the (a) LF and (b) HF electric field.

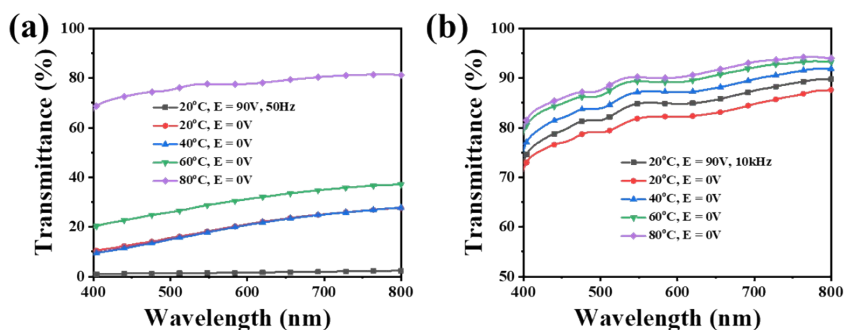

**Figure S2.** Transmission spectra of sample A4 at different temperature: (a) LF electric field; (b) HF electric field. Spectra at zero field ( $E = 0V$ ) condition are measured 48h after the field is removed.
